# Supplementary material
Source: Research Square preprint supplement (doi:10.21203/rs.3.rs-10364876/v1)
Supplement: Supplementary file 1 [file 75179b42ccdc6fe296d0e1f7.docx]

| Variable | Total | Post OLT Infections | | p value |
| --- | --- | --- | --- | --- |
| No | Yes |
| BUN | 39.57 ± 20.48 | 39.27 ± 21.17 | 40.50 ± 19.69 | 0.89 |
| Creatinine | 1.69 ± 0.82 | 1.66 ± 0.77 | 1.77 ± 1.03 | 0.95 |
| AST | 588.41 ± 638.93 | 444.91 ± 300.75 | 1039.43 ± 1129.47 | 0.24 |
| ALT | 739.69 ± 618.75 | 510.86 ± 271.62 | 1458.86 ± 856.18 | 0.01 |
| Alkaline phosphatase | 560.38 ± 492.41 | 437.27 ± 285.39 | 947.29 ± 785.01 | 0.05 |
| Total Bilirubin | 8.60 ± 6.69 | 7.90 ± 6.39 | 10.81 ± 7.63 | 0.22 |
| Direct Bilirubin | 4.09 ± 3.18 | 3.70 ± 2.92 | 5.33 ± 3.87 | 0.29 |
| WBC | 13.45 ± 5.26 | 11.62 ± 3.87 | 19.19 ± 5.12 | <0.001 |
| INR | 2.14 ± 1.28 | 2.25 ± 1.43 | 1.79 ± 0.58 | 0.64 |
| Hemoglobin | 8.30 ± 1.77 | 8.08 ± 1.81 | 9.01 ± 1.53 | 0.22 |
| Platelets | 120.21 ± 68.96 | 107.27 ± 66.10 | 160.86 ± 66.00 | 0.07 |
| Length of surgery | 5.74 ± 1.06 | 5.61 ± 1.11 | 6.14 ± 0.80 | 0.25 |

BMI, Body Mass Index; BMI, Blood Urea Nitrogen; AST, Aspartate Aminotransferase; ALT, Alanine Aminotransferase; WBC, White Blood Cells; INR, international Normalized Ratio
