# Supplementary material
Source: Research Square preprint supplement (doi:10.21203/rs.3.rs-10364876/v1)
Supplement: Supplementary file 2 [file aaf53d2cfd077159f7189e1e.docx]

| Variable | Total | Post-transplantation Infections | | p value |
| --- | --- | --- | --- | --- |
| No | Yes |
| Age | 42.62 ± 15.36 | 40.55 ± 15.37 | 49.14 ± 14.46 | 0.2 |
| BMI | 22.99 ± 3.05 | 22.50 ± 3.05 | 24.53 ± 2.67 | 0.12 |
| Preoperative hospital stay | 4.90 ± 8.73 | 4.86 ± 8.58 | 5.00 ± 9.90 | 0.61 |
| BUN | 25.17 ± 22.71 | 22.64 ± 13.78 | 33.14 ± 40.55 | 0.89 |
| Creatinine | 1.17 ± 0.53 | 1.12 ± 0.45 | 1.31 ± 0.77 | 0.57 |
| AST | 110.24 ± 91.79 | 111.09 ± 96.81 | 107.57 ± 80.66 | 0.89 |
| ALT | 71.00 ± 67.80 | 74.32 ± 76.13 | 60.57 ± 31.59 | 0.95 |
| Alkaline phosphatase | 718.97 ± 683.45 | 576.36 ± 605.34 | 1167.14 ± 767.07 | 0.07 |
| Total Bilirubin | 10.79 ± 10.89 | 10.49 ± 10.01 | 11.75 ± 14.20 | 0.83 |
| Direct Bilirubin | 5.26 ± 5.40 | 5.40 ± 5.44 | 4.83 ± 5.69 | 0.85 |
| WBC | 7.00 ± 3.70 | 6.08 ± 2.33 | 9.90 ± 5.66 | 0.12 |
| Platelets | 117.06 ± 68.54 | 124.05 ± 88.02 | 203.71 ± 149.21 | 0.2 |
| INR | 2.08 ± 1.16 | 2.30 ± 1.23 | 1.36 ± 0.41 | 0.02 |
| Hemoglobin | 10.76 ± 2.19 | 10.39 ± 1.78 | 11.93 ± 3.02 | 0.23 |
| MELD | 21.69 ± 9.82 | 22.91 ± 9.65 | 17.86 ± 10.07 | 0.24 |
| MELD-Na | 23.45 ± 9.41 | 24.68 ± 8.90 | 19.57 ± 10.61 | 0.28 |
| Gender (Male) | 20 (68.97%) | 14 (48.28%) | 6 (20.69%) | 0.27 |
| Diabetes | 6 (20.69%) | 3 (10.34%) | 3 (10.34%) | 0.09 |
| Hypertension | 3 (10.34%) | 2 (6.90%) | 1 (3.45) | 0.69 |
| Ulcerative Colitis | 4 (13.79%) | 3 (10.34%) | 1 (3.45%) | 0.96 |
| Autoimmunity | 5 (17.24%) | 4 (13.79%) | 1 (3.45%) | 0.81 |

BMI, Body Mass Index; BUN, Blood Urea Nitrogen; AST, Aspartate Aminotransferase; ALT, Alanine Aminotransferase; WBC, White Blood Cells; INR, international Normalized Ratio; MELD, Model for End-stage Liver Disease
